# Supplementary material for: The Long-Term Effects of Conventional and Atypical Antipsychotics in Patients With Probable Alzheimer’s Disease
Source: Atypon-hosted journal article supplement (doi:10.1176/appi.ajp.2013.12081046), 2013-07-30
Supplement: 1051_ds001.pdf [file 1051_ds001.pdf]

| <b>Supplemental Table 1: Baseline demographic, clinical, and genetic characteristics, and outcomes of 1538 Probable AD patients</b>                                                                                    |                                |             |                                                  |             |                                           |            |                                   |                |
|------------------------------------------------------------------------------------------------------------------------------------------------------------------------------------------------------------------------|--------------------------------|-------------|--------------------------------------------------|-------------|-------------------------------------------|------------|-----------------------------------|----------------|
|                                                                                                                                                                                                                        | <b>All cases<br/>(n= 1538)</b> |             | <b>No FU clinical<br/>evaluation<br/>(n=581)</b> |             | <b>FU clinical evaluation<br/>(n=957)</b> |            | <b>t-test-<math>\chi^2</math></b> | <b>p-value</b> |
|                                                                                                                                                                                                                        | <b>Mean</b>                    | <b>S.D.</b> | <b>Mean</b>                                      | <b>S.D.</b> | <b>Mean</b>                               | <b>S.D</b> |                                   |                |
| Age at study entry                                                                                                                                                                                                     | 73.5                           | 8.5         | 74.2                                             | 8.1         | 73.1                                      | 8.7        | 2.35                              | 0.01           |
| Education level, in years                                                                                                                                                                                              | 12.1                           | 2.9         | 11.7                                             | 2.9         | 12.4                                      | 2.9        | -4.45                             | <0.0001        |
| MMSE                                                                                                                                                                                                                   | 16.9                           | 6.0         | 14.9                                             | 6.3         | 18.2                                      | 5.4        | -10.7                             | <0.0001        |
| CDR                                                                                                                                                                                                                    | 1.3                            | .69         | 1.5                                              | .78         | 1.2                                       | .60        | 9.27                              | <0.0001        |
| HDRS                                                                                                                                                                                                                   | 6.5                            | 4.7         | 7.2                                              | 5.2         | 6.2                                       | 4.4        | 3.91                              | .002           |
| HRS                                                                                                                                                                                                                    | 2.5                            | 1.8         | 2.7                                              | 2.1         | 2.4                                       | 1.7        | 3.28                              | .001           |
| Duration of the disease, in years*                                                                                                                                                                                     | 4.0                            | 2.5         | 4.4                                              | 2.9         | 3.8                                       | 2.3        | 3.89                              | <0.0001        |
|                                                                                                                                                                                                                        | <b>N</b>                       | <b>%</b>    | <b>N</b>                                         | <b>%</b>    | <b>N</b>                                  | <b>%</b>   |                                   |                |
| Gender, Women                                                                                                                                                                                                          | 1054                           | 69          | 409                                              | 70          | 645                                       | 67.5       | 1.43                              | N.S.           |
| APOE-4 allele (n= 1086)                                                                                                                                                                                                | 624                            | 57.5        | 194                                              | 56          | 430                                       | 58         | 0.23                              | N.S.           |
| Hypertension†                                                                                                                                                                                                          | 603                            | 39          | 217                                              | 37          | 386                                       | 40         | 1.38                              | N.S.           |
| Diabetes Mellitus‡                                                                                                                                                                                                     | 110                            | 7           | 47                                               | 8           | 63                                        | 7          | 1.22                              | N.S.           |
| Heart Disease #                                                                                                                                                                                                        | 199                            | 13          | 66                                               | 11          | 133                                       | 14         | 2.08                              | N.S.           |
| Deceased                                                                                                                                                                                                               | 602                            | 39          | 199                                              | 36          | 403                                       | 42         | 9.47                              | 0.002          |
| Nursing home admission                                                                                                                                                                                                 | 445                            | 28          | 137                                              | 24          | 308                                       | 32         | 13.1                              | <0.0001        |
| † told by doctor; ‡ told by doctor and using hypoglycemic agents, # History of congestive heart failure, angina, or coronary by-pass grafting/coronary angioplasty. * From the onset of the symptoms to initial visit. |                                |             |                                                  |             |                                           |            |                                   |                |
| <b>Abbreviations:</b> MMSE: Mini-Mental State examination; CDR: Clinical Dementia Rating, HDRS: Hamilton Depression Rating Scale, HRS: Hachinski Rating Scale. N.S.: not significant                                   |                                |             |                                                  |             |                                           |            |                                   |                |

| <b>Supplemental Table 2: Clinical characteristics and medication use of 1537 Probable AD patients</b> |                                |          |                                                  |          |                                           |          |          |                |
|-------------------------------------------------------------------------------------------------------|--------------------------------|----------|--------------------------------------------------|----------|-------------------------------------------|----------|----------|----------------|
|                                                                                                       | <b>All cases<br/>(n= 1538)</b> |          | <b>No FU clinical<br/>evaluation<br/>(n=581)</b> |          | <b>FU clinical evaluation<br/>(n=957)</b> |          | $\chi^2$ | <b>p-value</b> |
|                                                                                                       | <b>N</b>                       | <b>%</b> | <b>N</b>                                         | <b>%</b> | <b>N</b>                                  | <b>%</b> |          |                |
| <b>Baseline psychiatric symptoms</b>                                                                  |                                |          |                                                  |          |                                           |          |          |                |
| Major Depression                                                                                      | 170                            | 11       | 70                                               | 12       | 100                                       | 10.5     | 0.92     | N.S.           |
| Psychosis                                                                                             | 633                            | 41       | 280                                              | 48       | 343                                       | 37       | 18.8     | <0.0001        |
| Aggression                                                                                            | 273                            | 18       | 131                                              | 23       | 142                                       | 15       | 13.0     | <0.0001        |
| Agitation                                                                                             | 906                            | 60       | 357                                              | 63       | 549                                       | 57.5     | 5.16     | 0.02           |
| <b>Baseline neurological syndromes</b>                                                                |                                |          |                                                  |          |                                           |          |          |                |
| Baseline Extrapyramidal signs                                                                         | 748                            | 49       | 346                                              | 60       | 402                                       | 42       | 44.0     | <0.0001        |
| <b>Baseline psychiatric and dementia<br/>medications</b>                                              |                                |          |                                                  |          |                                           |          |          |                |
| Antidepressants                                                                                       | 348                            | 23       | 114                                              | 20       | 234                                       | 24.5     | 4.86     | 0.02           |
| Antipsychotics                                                                                        | 115                            | 7        | 44                                               | 8        | 71                                        | 7        | 0.01     | N.S.           |
| Dementia medications                                                                                  | 290                            | 19       | 76                                               | 13       | 214                                       | 22       | 20.4     | <0.0001        |
| Aggression                                                                                            |                                |          |                                                  |          |                                           |          |          |                |

| <b>Supplemental Table 3: Results of the proportional hazard model examining risks associated with <u>nursing home admission</u> in subjects using antipsychotics</b> |              |               |         |              |               |         |              |               |         |
|----------------------------------------------------------------------------------------------------------------------------------------------------------------------|--------------|---------------|---------|--------------|---------------|---------|--------------|---------------|---------|
| Variable                                                                                                                                                             | Model 1      |               |         | Model 2      |               |         | Model 3      |               |         |
|                                                                                                                                                                      | Hazard Ratio | 95% CI        | p-value | Hazard Ratio | 95% CI        | p-value | Hazard Ratio | 95% CI        | p-value |
| Antipsychotics                                                                                                                                                       | 1.80         | (1.39 – 2.32) | <0.0001 | 1.83         | (1.42 – 2.37) | <0.0001 | 1.22         | (0.92 – 1.61) | .17     |
| Age                                                                                                                                                                  | 1.00         | (.99 – 1.01)  | .97     | 0.99         | (0.98 – 1.01) | .35     | 1.00         | (0.98 – 1.01) | .70     |
| Education                                                                                                                                                            | 1.05         | (1.01 – 1.09) | 0.01    | 1.05         | (1.01 – 1.10) | 0.01    | 1.07         | (1.03 – 1.11) | 0.001   |
| Gender                                                                                                                                                               | 0.90         | (0.70 – 1.16) | .43     | 0.86         | (0.67 – 1.11) | .23     | .082         | (0.64 – 1.06) | .13     |
| MMSE                                                                                                                                                                 | 0.93         | (0.92 – 0.97) | <0.0001 | 0.95         | (0.92 – 0.97) | <0.0001 | 0.95         | (0.93 – 0.98) | <0.0001 |
| EPS                                                                                                                                                                  |              |               |         | 1.25         | (0.98 – 1.59) | .07     | 1.26         | (0.98 – 1.61) | .07     |
| Incident Stroke                                                                                                                                                      |              |               |         | 1.06         | (0.71 – 1.57) | .78     | 0.88         | (0.58 – 1.33) | .54     |
| Hypertension                                                                                                                                                         |              |               |         | 0.98         | (0.76 – 1.25) | .85     | 1.16         | (0.90 – 1.49) | .26     |
| Diabetes mellitus                                                                                                                                                    |              |               |         | 1.22         | (0.78 – 1.91) | .39     | 1.18         | (0.75 – 1.88) | .47     |
| Heart disease                                                                                                                                                        |              |               |         | 1.53         | (1.10 – 2.14) | .01     | 1.56         | (1.11 – 2.19) | .01     |
| Aggression                                                                                                                                                           |              |               |         |              |               |         | 1.28         | (0.96 – 1.70) | .09     |
| Agitation                                                                                                                                                            |              |               |         |              |               |         | 1.36         | (1.03 – 1.81) | .03     |
| Depression                                                                                                                                                           |              |               |         |              |               |         | 1.12         | (0.81 – 1.57) | .49     |
| Psychosis                                                                                                                                                            |              |               |         |              |               |         | 1.58         | (1.21 – 2.07) | .001    |
| Dementia medication                                                                                                                                                  |              |               |         |              |               |         | 0.35         | (0.27 – 0.47) | <.0001  |
| Model 1: Controlled for age, education level (<12 years), gender, and baseline Mini-mental state examination (MMSE) scores.                                          |              |               |         |              |               |         |              |               |         |
| Model 2: Model 1 + extrapyramidal signs (EPS), incident stroke, heart disease, diabetes mellitus, and hypertension.                                                  |              |               |         |              |               |         |              |               |         |
| Model 3: Model 2 + psychosis, depression, aggression, agitation, and dementia medication.                                                                            |              |               |         |              |               |         |              |               |         |

| <b>Supplemental Table 4: Results of the proportional hazard model examining risks associated with <u>death</u> in subjects using antipsychotics</b> |              |               |         |              |               |         |              |               |         |
|-----------------------------------------------------------------------------------------------------------------------------------------------------|--------------|---------------|---------|--------------|---------------|---------|--------------|---------------|---------|
| Variable                                                                                                                                            | Model 1      |               |         | Model 2      |               |         | Model 3      |               |         |
|                                                                                                                                                     | Hazard Ratio | 95% CI        | p-value | Hazard Ratio | 95% CI        | p-value | Hazard Ratio | 95% CI        | p-value |
| Antipsychotics                                                                                                                                      | 0.98         | (.79 – 1.22)  | 0.85    | .99          | (0.79 – 1.23) | .90     | 0.88         | (0.69 – 1.11) | .27     |
| Age                                                                                                                                                 | 1.04         | (1.02 – 1.05) | <.0001  | 1.03         | (1.02 – 1.04) | <.0001  | 1.03         | (1.02 – 1.04) | <.0001  |
| Education                                                                                                                                           | 1.05         | (1.01 – 1.09) | .008    | 1.06         | (1.02 – 1.09) | .0002   | 1.06         | (1.02 – 1.09) | 0.002   |
| Gender                                                                                                                                              | 1.54         | (1.24 – 1.90) | <.0001  | 1.53         | (1.23 – 1.09) | <.001   | 1.50         | (1.20 – 1.87) | <.001   |
| MMSE                                                                                                                                                | 0.94         | (0.92 – 0.95) | <.0001  | 0.94         | (0.92 – 0.96) | <.0001  | 1.58         | (1.27 – 1.95) | <.0001  |
| EPS                                                                                                                                                 |              |               |         | 1.51         | (1.22 – 1.86) | <.001   | 1.58         | (1.27 – 1.95) | <.0001  |
| Incident Stroke                                                                                                                                     |              |               |         | 1.34         | (0.97 – 1.85) | .07     | 1.24         | (0.89 – 1.73) | .21     |
| Hypertension                                                                                                                                        |              |               |         | 1.17         | (0.95 – 1.44) | .15     | 1.15         | (0.93 – 1.42) | .20     |
| Diabetes mellitus                                                                                                                                   |              |               |         | 1.42         | (0.97 – 2.08) | .07     | 1.36         | (0.92 – 2.02) | .12     |
| Heart disease                                                                                                                                       |              |               |         | 0.89         | (0.66 – 1.19) | .89     | 0.66         | (1.11 – 1.20) | .44     |
| Aggression                                                                                                                                          |              |               |         |              |               |         | 1.30         | (1.01 – 1.67) | .03     |
| Agitation                                                                                                                                           |              |               |         |              |               |         | 0.98         | (0.77 – 1.26) | .88     |
| Depression                                                                                                                                          |              |               |         |              |               |         | 1.28         | (0.97 – 1.70) | .08     |
| Psychosis                                                                                                                                           |              |               |         |              |               |         | 1.24         | (0.99 – 1.56) | .06     |
| Dementia medication                                                                                                                                 |              |               |         |              |               |         | 1.03         | (0.81 – 1.31) | .79     |
| Model 1: Controlled for age, education level (<12 years), gender, and baseline Mini-mental state examination (MMSE) scores.                         |              |               |         |              |               |         |              |               |         |
| Model 2: Model 1 + extrapyramidal signs (EPS), incident stroke, heart disease, diabetes mellitus, and hypertension.                                 |              |               |         |              |               |         |              |               |         |
| Model 3: Model 2 + psychosis, depression, aggression, agitation, and dementia medication.                                                           |              |               |         |              |               |         |              |               |         |
